# Supplementary material for: Omics Approaches in Uncovering Molecular Evolution and Physiology of Botanical Carnivory
Source: MDPI journal article supplement (doi:10.3390/plants12020408), 2023-01-15
Supplement: s1 [file s1]

**Supplementary Table S1.** A summary of genomic and transcriptomic studies on carnivorous plant species.

| Species                                                          | Genome size (Mbp) | Plastome size (kbp) | Sequencing platform(s)                          | Genome (BioProject)                                                                   | Plastome (NCBI RefSeq) | Transcriptome (BioProject)                                             | References    |
|------------------------------------------------------------------|-------------------|---------------------|-------------------------------------------------|---------------------------------------------------------------------------------------|------------------------|------------------------------------------------------------------------|---------------|
| <i>A. vesiculosa</i>                                             | 509               | 141.6               | PacBio RS,<br>Illumina HiSeq                    | PRJEB35196<br>PRJNA394436<br>PRJNA453847                                              | NC_035416.1            | -                                                                      | [11]          |
| <i>C. follicularis</i>                                           | 2,110             | 142.7               | Illumina HiSeq;<br>Illumina MiSeq               | PRJDB4484<br>PRJNA548736<br>PRJNA810039<br>(metagenome)                               | NC_042597.1            | PRJDB4484                                                              | [41,63]       |
| <i>D. binata</i> ,<br><i>D. lusitanicum</i> ,<br><i>N. alata</i> | -                 | -                   | -                                               | -                                                                                     | -                      | PRJNA350559                                                            | [2]           |
| <i>D. rotundifolia</i>                                           | -                 | 192.9               | Roche 454 GS-FLX;<br>Illumina MiSeq             | PRJNA316228                                                                           | NC_029770.1            | PRJNA534215                                                            | [19]          |
| <i>D. muscipula</i>                                              | 3,180             | 117.6               | PacBio RS;<br>Illumina HiSeq;<br>Illumina MiSeq | PRJEB35195<br>PRJNA394358<br>PRJNA453821<br>PRJNA790936<br>PRJEB15538<br>(metagenome) | NC_035417.1            | PRJEB38423<br>PRJNA203407<br>PRJNA208984<br>PRJNA530242<br>PRJNA862127 | [11-14]       |
| <i>D. capensis</i>                                               | 293               | -                   | Illumina HiSeq                                  | PRJNA291419                                                                           | -                      | -                                                                      | [17]          |
| <i>D. spatulata</i>                                              | 323               | -                   | PacBio RS II;<br>Illumina HiSeq                 | PRJDB9009<br>PRJNA790939                                                              | -                      | PRJDB9009                                                              | [11]          |
| <i>G. aurea</i>                                                  | 63.6              | 140.0               | Illumina HiSeq                                  | PRJNA208769<br>PRJNA438327                                                            | NC_037078.1            | -                                                                      | [7,64]        |
| <i>N. ampullaria</i>                                             | -                 | -                   | PacBio RS II;<br>Illumina HiSeq                 | -                                                                                     | -                      | PRJNA279267<br>PRJNA299862                                             | [32,34,37,65] |
| <i>N. khasiana</i>                                               | -                 | 156.9               | Illumina HiSeq                                  | PRJNA680098<br>PRJNA473234                                                            | NC_051455.1            | PRJEB22838<br>PRJNA296942<br>PRJNA345154                               | [30,66]       |
| <i>N. mirabilis</i>                                              | 691.4             | 155.8               | Roche 454 GS-FLX;<br>DNBSEQ-T7                  | PRJNA529137<br>PRJNA869487                                                            | NC_041271.1            | PRJNA387677<br>PRJNA883181                                             | [24,67]       |

|                                                                               |                            |       |                                                                                      |                                                           |             |                                                                                     |               |
|-------------------------------------------------------------------------------|----------------------------|-------|--------------------------------------------------------------------------------------|-----------------------------------------------------------|-------------|-------------------------------------------------------------------------------------|---------------|
| <i>N. rafflesiana</i>                                                         | -                          | -     | PacBio RS II;<br>Illumina HiSeq                                                      | -                                                         | -           | PRJNA282399<br>PRJNA299862                                                          | [23,32,37]    |
| <i>N. × hookeriana</i><br>( <i>N. rafflesiana</i> ×<br><i>N. ampullaria</i> ) | -                          | -     | PacBio RS II                                                                         | -                                                         | -           | PRJNA299862                                                                         | [32,37]       |
| <i>N. × ventrata</i><br>( <i>N. alata</i> × <i>N.</i><br><i>ventricosa</i> )  | -                          | 156.6 | Illumina HiSeq;<br>Illumina MiSeq                                                    | PRJNA557906                                               | NC_044185.1 | PRJNA299862<br>PRJNA487526                                                          | [19,25,27,31] |
| <i>Nepenthes</i> spp.<br>(Multi-species)                                      | -                          | -     | Illumina HiSeq;<br>Illumina MiSeq                                                    | PRJNA516491                                               | -           | PRJEB20488<br>PRJEB35235<br>PRJEB37794,PRJEB37797<br>GenBank: MH544206–<br>MH544225 | [29,54]       |
| <i>S. alata</i>                                                               | 3,162                      | -     | PacBio Sequel,<br>Illumina HiSeq,<br>BioNano;<br>Roche 454 GS-FLX;<br>Illumina MiSeq | PRJNA604471<br>GenBank: JN665096–<br>JN667881             | -           | PRJNA609445<br>(metatranscriptome)                                                  | [4]           |
| <i>S. psittacina</i>                                                          | -                          | -     | Roche 454 GS-FLX                                                                     | -                                                         | -           | PRJNA80051                                                                          | [5]           |
| <i>S. purpurea</i>                                                            | -                          | -     | Roche 454 GS-FLX                                                                     | -                                                         | -           | PRJNA80053                                                                          | [5]           |
| <i>U. gibba</i>                                                               | 100.7 (PacBio<br>assembly) | 152.1 | Roche 454 GS-FLX;<br>Ion Torrent PGM;<br>PacBio RS;<br>Illumina HiSeq                | PRJNA207602<br>PRJNA383049<br>PRJNA633566<br>(methyloome) | NC_021449.1 | PRJNA79917<br>PRJNA189698<br>PRJNA354080<br>PRJNA574143<br>PRJNA595351              | [8,10,51]     |
| <i>U. reniformis</i>                                                          | 317.1                      | 139.7 | Illumina HiScanSQ,<br>Illumina MiSeq,<br>Ion Torrent Proton;<br>Roche 454 GS-FLX     | PRJNA290588<br>PRJNA302107<br>PRJNA316304<br>PRJNA374515  | NC_029719.2 | PRJNA290588                                                                         | [9,68]        |

- : not available; References can refer to the main manuscript.
